# Supplementary material for: PCR Array Profiling of miRNA Expression Involved in the Differentiation of Amniotic Fluid Stem Cells toward Endothelial and Smooth Muscle Progenitor Cells
Source: MDPI journal article supplement (doi:10.3390/ijms25010302), 2023-12-25
Supplement: s1 [file s1]

Table S1. General electrical characteristics of SPC from the n=24 whole-cell patch-clamp experiments and applied pharmacological compounds

| Exp. no.       | Cm (pF)         | Rm (GOhms)      | Ra (MOhms)      | Tau (μs)        | Hold (pA)           | Pipette sol           | Comp1.                                | Comp2.                                   | Comp3.                                                                               | Comp4.                    | Comp5.                     |
|----------------|-----------------|-----------------|-----------------|-----------------|---------------------|-----------------------|---------------------------------------|------------------------------------------|--------------------------------------------------------------------------------------|---------------------------|----------------------------|
| 19812          | 18.56668        | 5.082514        | 9.910785        | 183.636         | 0.087193            | efficient             |                                       |                                          |                                                                                      |                           |                            |
| a9812          | 53.65738        | 0.238585        | 9.236898        | 477.148         | -1.75839            | efficient             |                                       |                                          |                                                                                      |                           |                            |
| b9812          | 102.5927        | 0               | 19.3656         | 1566.091        | -1.75355            | efficient             | isoprenaline 1uM (sw.4-6)             |                                          |                                                                                      |                           |                            |
| 19813          | 19.98872        | 3.439259        | 18.31221        | 363.8603        | 7.706899            | efficient             |                                       |                                          |                                                                                      |                           |                            |
| a9813          | 22.22567        | 0.02929         | 12.1516         | 268.8575        | 127.7693            | efficient             |                                       |                                          |                                                                                      |                           |                            |
| b9813          | 89.67826        | 3.774866        | 37.55514        | 3333.431        | -1.79472            | efficient             | phrixotoxin-1 280 nM (b9813006-007)   | isoprenaline 1 uM (b9813008)             | b9813010 sw.1-3 isopren.1uM; sw.4-10CTRL; sw.11-18 phrixotoxin1-280nM; sw.19-22 CTRL |                           |                            |
| 19814          | 13.26327        | 9.414673        | 8.058297        | 106.7609        | 1.019675            | efficient+B-escin30uM | DIDS 100 uM                           | isoprenaline 1 uM                        |                                                                                      |                           |                            |
| a9814          | 10.03194        | 0.738725        | 50.90118        | 477.5226        | -9.08988            | efficient+B-escin30uM |                                       |                                          |                                                                                      |                           |                            |
| b9814          | 47.59146        | 5.126311        | 6.271327        | 298.0778        | -3.70571            | efficient+B-escin30uM | DIDS 100 uM (b9814006)                | isoprenaline 1 uM (b9814006)             |                                                                                      |                           |                            |
| 19815          | 46.72194        | 0.337481        | 16.20167        | 721.9554        | -171.623            | efficient+B-escin30uM |                                       |                                          |                                                                                      |                           |                            |
| a9815          | 12.20971        | 5.351932        | 5.313883        | 64.80184        | -5.46168            | efficient+B-escin30uM |                                       |                                          |                                                                                      |                           |                            |
| b9815          | 14.25296        | 1.038694        | 8.21407         | 116.1505        | -40.4552            | efficient+B-escin30uM | iberiotoxin 100 nM (b9815001 sw.4-12) | isoprenaline 1 uM (b9815003-005)         |                                                                                      |                           |                            |
| 19821          | 28.66045        | 5.8211          | 5.259459        | 150.5858        | 1.295786            | efficient             | nifedipine 1uM (19821004-005)         | mibefradil 5 uM (19821006-007;008)       |                                                                                      |                           |                            |
| a9821          | 23.03082        | 4.831777        | 15.7046         | 360.4406        | -1.82137            | efficient             | nifedipine 1uM                        | mibefradil 5 uM                          |                                                                                      |                           |                            |
| b9821          | 29.08172        | 0.119746        | 9.406697        | 253.6306        | -72.4284            | efficient             | nifedipine 1uM (b9821004-006)         | mibefradil 5 uM (b9821007-009)           |                                                                                      |                           |                            |
| 19822          | 19.73436        | 2.712283        | 22.58532        | 441.4361        | -14.5855            | efficient             | NaCN 5 mM (19822006 sw.7-12)          | glibenclamide 100 uM (19822006 sw.13-18) | DIDS 100 uM (19822006 sw.19-20)                                                      |                           |                            |
| a9822          | 37.59555        | 0.342509        | 9.341733        | 341.8629        | -18.2403            | efficient             | NaCN 5 mM                             | glibenclamide 100 uM                     | DIDS 100 uM                                                                          |                           |                            |
| b9822          | 33.23796        | 4.623733        | 4.336124        | 143.9814        | -0.51347            | efficient             | NaCN 5 mM                             | glibenclamide 100 uM                     | DIDS 100 uM                                                                          |                           |                            |
| 19904 *        | 27.61662        | 8.205615        | 13.25584        | 365.4303        | 1.261878            | efficient             | NaCN 5 mM                             |                                          |                                                                                      |                           |                            |
| a9904 *        | 31.38796        | 3.23914         | 20.57461        | 641.6375        | -6.94638            | efficient             |                                       |                                          |                                                                                      | Nifedipine 1uM (a9904008) | Mibefradil 10uM (a9904009) |
| b9904 *        | 27.96927        | 0.570465        | 7.877897        | 217.3263        | -2.26702            | efficient             | NaCN 5 mM (b9904008-009)              |                                          |                                                                                      |                           |                            |
| 19909 *        | 38.3887         | 2.286035        | 16.83559        | 641.3249        | -6.49588            | efficient             | NaCN 5 mM                             |                                          |                                                                                      |                           |                            |
| a9909 *        | 47.3762         | 5.394057        | 4.495904        | 212.7809        | -0.07266            | efficient             | NaCN 5 mM                             |                                          |                                                                                      |                           |                            |
| b9909 *        | 43.96655        | 3.218766        | 8.215519        | 360.2402        | -1.26672            | efficient             | NaCN 5 mM                             |                                          |                                                                                      |                           |                            |
| <b>Average</b> | <b>34.95112</b> | <b>3.164065</b> | <b>14.14091</b> | <b>504.5404</b> | <b>-9.214108517</b> |                       |                                       |                                          |                                                                                      |                           |                            |
| <b>SD</b>      | <b>22.58335</b> | <b>2.685901</b> | <b>10.86953</b> | <b>676.1914</b> | <b>47.30554816</b>  |                       |                                       |                                          |                                                                                      |                           |                            |

\* - SPC cultures pretreated with nifedipine 1 mM applied directly to the culture medium for 24-48 h

Table S2. Analysis of principal ionic current components recorded in SPC within the n = 24 whole-cell patch-clamp experiments

| Exp. no. | I A current (pA) at +60 mV | tau at +60 mV (ms) | outward rectifier (pA) at +60 mV (average of last 100 ms) | BK-like current fluctuations at +60 mV |                  | Na current      |                      | outward current at +80 mV (2.030-+0.07s) |             | inward rectifier               | reversal potential (asc. ramp) |
|----------|----------------------------|--------------------|-----------------------------------------------------------|----------------------------------------|------------------|-----------------|----------------------|------------------------------------------|-------------|--------------------------------|--------------------------------|
|          |                            |                    |                                                           | peak ampl (pA)                         | SD (last 250 ms) | peak ampl. (pA) | voltage step of peak | mean (pA)                                | SD (pA)     | pA at -120 mV (base at -80 mV) | mV                             |
| 19812    |                            |                    |                                                           |                                        |                  |                 |                      | 74.0487                                  | 7.64698     | -16.8                          | -46.5                          |
| a9812    | 596.3                      | 4.63876            | 240.166                                                   | 36.3                                   | 8.79673          |                 |                      | 222.172272                               | 8.810999    | -18.6                          | -66.9                          |
| b9812    | 2469                       | 6.88189            | 555.942                                                   | 127.3                                  | 34.4758          |                 |                      | 854.371826                               | 19.862598   | -42.1                          | -94.9                          |
| 19813    | 50.32                      | 3.02378            | 15.88                                                     | 43.8                                   | 7.45868          | -32.6           | 0                    | 39.393467                                | 13.509698   | -4.3                           | -68.3                          |
| a9813    |                            |                    |                                                           |                                        |                  |                 |                      |                                          |             |                                |                                |
| b9813    | 210.9                      | 7.43316            | 77.791                                                    | 35.1                                   | 8.60377          |                 |                      |                                          |             |                                |                                |
| 19814    | 391.5                      | 13.9295            | 17.6061                                                   | 29.3                                   | 5.34562          |                 |                      | 42.64294434                              | 13.58994007 | -3.4                           | -56.88                         |
| a9814    |                            |                    |                                                           |                                        |                  |                 |                      |                                          |             |                                |                                |
| b9814    | -                          | -                  | 88.4995                                                   | 113.2                                  | 31.539           |                 |                      | 339.7509155                              | 57.75685883 | -5.5                           | -53.28                         |
| 19815    | -                          | -                  | 454.533                                                   | 49.4                                   | 14.373           |                 |                      |                                          |             |                                |                                |
| a9815    |                            |                    |                                                           |                                        |                  |                 |                      | 145.3754272                              | 25.1792469  | -                              | -36.67                         |
| b9815    | 170.6                      | 14.3085            | 6.18702                                                   | 25.3                                   | 3.60635          |                 |                      | 289.8139038                              | 48.3679924  | -17.1                          | -26.98                         |
| 19821    | -                          | -                  | 121.004                                                   | 138.9                                  | 29.8054          |                 |                      | 323.9849243                              | 59.25339127 | -41.5                          | -37.5                          |
| a9821    | -                          | -                  | 45.0157                                                   | 65.9                                   | 13.4368          |                 |                      | 86.2383194                               | 19.70644379 | 1.2                            | -72.2                          |
| b9821    | 510.6                      | 26.4091            | 221.445                                                   | 87.3                                   | 26.7935          |                 |                      | 451.7289429                              | 36.21746063 | -90                            | -42.24                         |
| 19822    | -                          | -                  | 78.9054                                                   | 62                                     | 13.7973          |                 |                      | 73.98690033                              | 1.044837236 | -16.2                          | -29.05                         |
| a9822    | 524.6                      | 34.1908            | 198.322                                                   | 144                                    | 34.1872          |                 |                      | 74.03349304                              | 1.016172171 | -42.18                         | -34.15                         |
| b9822    | 93.1                       | 118.715            | 55.9557                                                   | 97.9                                   | 21.5797          |                 |                      | 123.6133881                              | 36.69259262 | -6.5                           | -35.13                         |
| 19904    | -                          | -                  | 27.396                                                    | 37.3                                   | 10.9171          |                 |                      | 74.08636475                              | 1.008280873 | -3.6                           | -49.44                         |
| a9904    | -                          | -                  | 51.1314                                                   | 86.1                                   | 20.1113          |                 |                      | 85.43177795                              | 24.567379   | -3.7                           | -51.71                         |
| b9904    | 119.6                      | 73.4293            | 97.8734                                                   | 104.1                                  | 26.4308          |                 |                      | 288.1426086                              | 56.10247421 | -7.9                           | -94.8                          |
| 19909    | -                          | -                  | 103.275                                                   | 82.9                                   | 26.6338          |                 |                      | 238.3852692                              | 40.49472809 | -11.6                          | -41.63                         |
| a9909    | -                          | -                  | 158.183                                                   | 101.3                                  | 31.0576          |                 |                      | 312.6074524                              | 64.26789856 | -7.3                           | -84.38                         |
| b9909    | -                          | -                  | 141.104                                                   | 118.7                                  | 33.886           |                 |                      | 251.4390564                              | 50.62667465 | -4.6                           | -89.75                         |
| average  | 513.652                    | 30.295979          | 137.810761                                                | 79.305                                 | 20.1417725       |                 |                      | 219.5623977                              | 29.28613231 | -17.9831579                    | -55.6195                       |
| SD       | 715.031                    | 37.572358          | 143.441984                                                | 38.339048                              | 10.7132904       |                 |                      | 192.0598567                              | 21.39648512 | 22.12896168                    | 22.05950982                    |

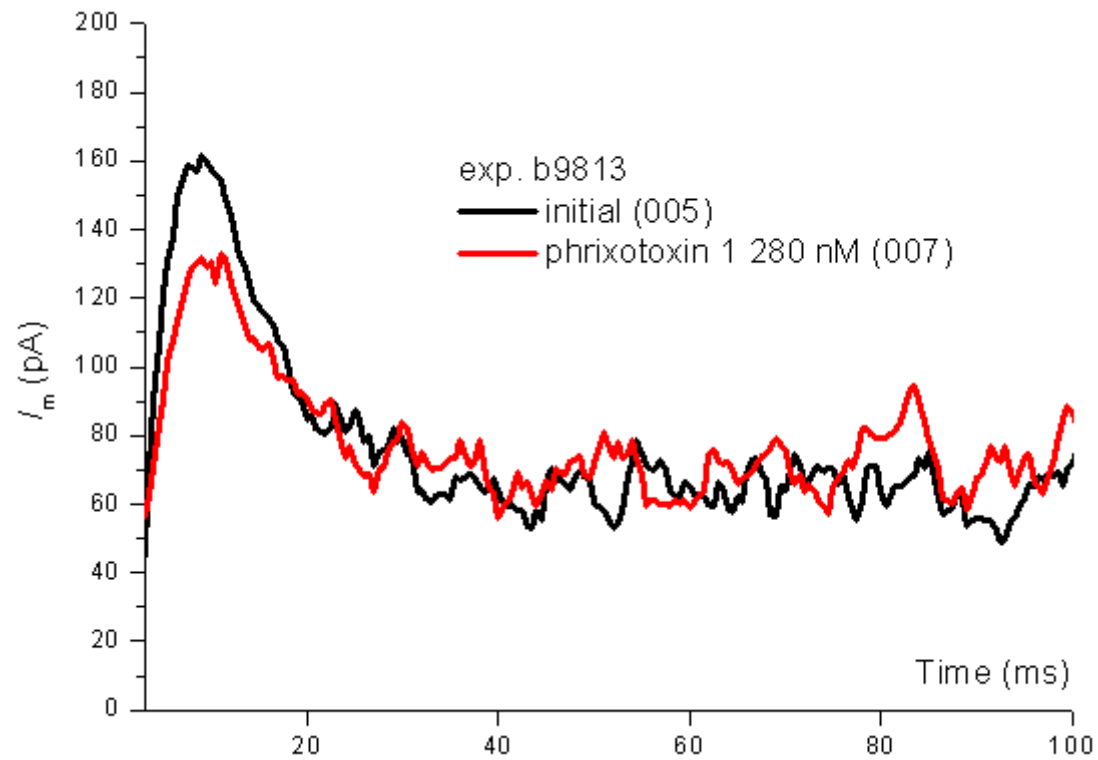

Figure S1. Inhibitory effect of phrixotoxin 1 (280 nM) on the  $I_{to}$  fast component, highlighted in the general IK voltage-clamp protocol during the depolarization step at +50 mV.

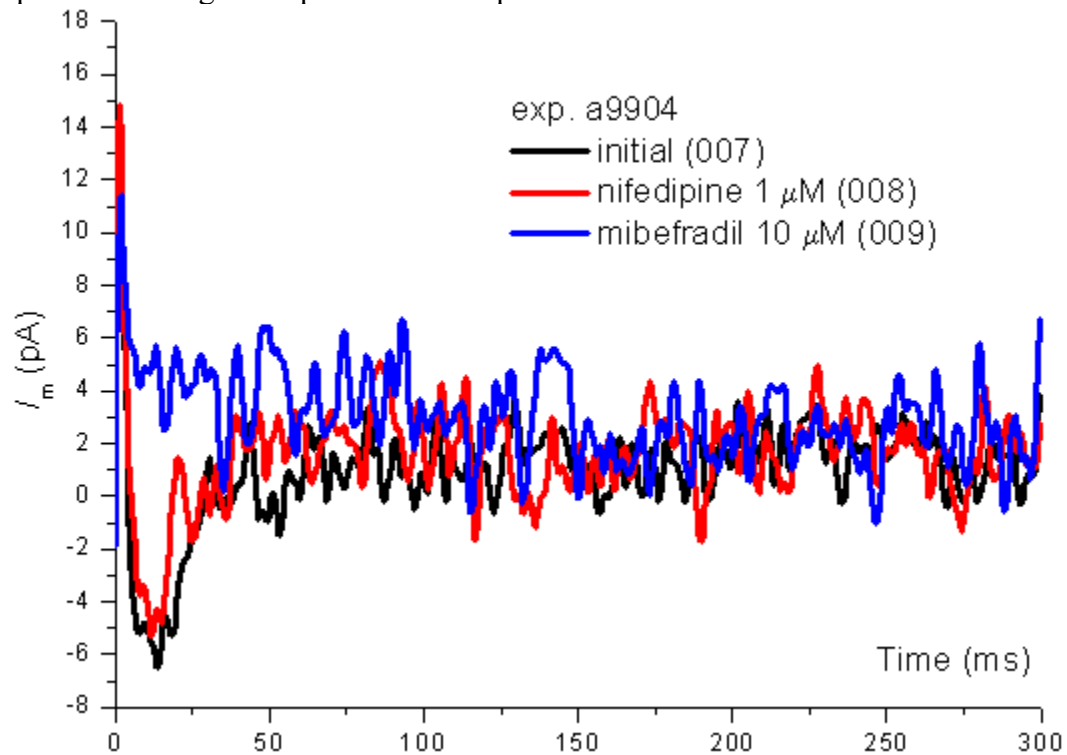

Figure S2. Lack of effect of 1  $\mu$ M nifedipine and inhibitory effect of 10  $\mu$ M mibefradil on the T-type  $\text{Ca}^{2+}$  current component ( $I_{\text{CaT}}$ ) measured in the depolarizing step at -40 mV with the general IK protocol

Table S3. TaqMan assays used for characterization of progenitor cells.

| Gene                                  | TaqMan assay code | Producer                                      |
|---------------------------------------|-------------------|-----------------------------------------------|
| CD31 (PECAM-1)                        | Hs01065279_m1     | Thermo Fischer Scientific, Massachusetts, USA |
| eNOS                                  | Hs01574665_m1     | Thermo Fischer Scientific, Massachusetts, USA |
| CD144 (VE-cadherin)                   | Hs00901465_m1     | Thermo Fischer Scientific, Massachusetts, USA |
| CD54 (ICAM-1)                         | Hs00164932_m1     | Thermo Fischer Scientific, Massachusetts, USA |
| vWF (von Willebrand Factor)           | Hs01109446_m1     | Thermo Fischer Scientific, Massachusetts, USA |
| Smoothelin                            | Hs01022255_g1     | Thermo Fischer Scientific, Massachusetts, USA |
| Calponin 1                            | Hs00959434_m1     | Thermo Fischer Scientific, Massachusetts, USA |
| SMA ( $\alpha$ - smooth muscle actin) | Hs00426835_g1     | Thermo Fischer Scientific, Massachusetts, USA |
| Myh11 (myosin heavy chain)            | Hs00975796_m1     | Thermo Fischer Scientific, Massachusetts, USA |
| tropomyosin 1                         | Hs04398572_m1     | Thermo Fischer Scientific, Massachusetts, USA |
| Caldesmon-1                           | Hs00921987_m1     | Thermo Fischer Scientific, Massachusetts, USA |
| CACNA1G (cav3.1, R-type)              | Hs00367969_m1     | Thermo Fischer Scientific, Massachusetts, USA |
